# Supplementary material for: Seroprevalence, Prevalence, and Genomic Surveillance: Monitoring the Initial Phases of the SARS-CoV-2 Pandemic in Betim, Brazil
Source: Frontiers journal article supplement (doi:10.3389/fmicb.2022.799713), 2022-02-07
Supplement: Data_Sheet_2.PDF [file Data_Sheet_2.PDF]

**Table S2:** Association of clinical and epidemiological data with a positive test (serological or molecular). Bolded p values indicate  $p < 0.05$ .

| Variable                       | Level       | Positive     | Negative     | p-value         |
|--------------------------------|-------------|--------------|--------------|-----------------|
| Survey                         | First       | 5 (4.7%)     | 1074 (34.3%) | < <b>0.0001</b> |
|                                | Second      | 29 (27.4%)   | 1051 (33.5%) |                 |
|                                | Third       | 72 (67.9%)   | 1008 (32.2%) |                 |
| Administrative Regions         | Alterosas   | 18 (17.0%)   | 616 (19.7%)  | <b>0.002424</b> |
|                                | Citrolândia | 4 (3.8%)     | 215 (6.9%)   |                 |
|                                | Icaivera    | 0 (0.0%)     | 62 (2.0%)    |                 |
|                                | Imbirucu    | 32 (30.2%)   | 533 (17.0%)  |                 |
|                                | Norte       | 11 (10.4%)   | 322 (10.3%)  |                 |
|                                | Petrovale   | 0 (0.0%)     | 41 (1.3%)    |                 |
|                                | PTB         | 8 (7.5%)     | 282 (9.0%)   |                 |
|                                | Sede        | 15 (14.2%)   | 568 (18.1%)  |                 |
|                                | Terezópolis | 17 (16.0%)   | 302 (9.6%)   |                 |
|                                | Vianópolis  | 1 (0.9%)     | 192 (6.1%)   |                 |
| Sex                            | Female      | 69 (65.1%)   | 1559 (49.8%) | <b>0.002642</b> |
| Age range                      | Male        | 37 (34.9%)   | 1574 (50.2%) | 0.190538        |
|                                | 0-5         | 3 (2.8%)     | 214 (6.8%)   |                 |
|                                | 06-19       | 15 (14.2%)   | 635 (20.3%)  |                 |
|                                | 20-39       | 42 (39.6%)   | 1025 (32.7%) |                 |
|                                | 40-59       | 31 (29.2%)   | 840 (26.8%)  |                 |
|                                | Above60     | 15 (14.2%)   | 419 (13.4%)  |                 |
| International travel           | No          | 106 (100.0%) | 3119 (99.6%) | 1               |
|                                | Yes         | 0 (0.0%)     | 14 (0.4%)    |                 |
| Fever                          | No          | 88 (83.0%)   | 2927 (93.4%) | <b>0.000075</b> |
|                                | Yes         | 18 (17.0%)   | 206 (6.6%)   |                 |
| Cough                          | No          | 73 (68.9%)   | 2518 (80.4%) | <b>0.005304</b> |
|                                | Yes         | 33 (31.1%)   | 615 (19.6%)  |                 |
| Sore throat                    | No          | 77 (72.6%)   | 2765 (88.3%) | <b>0.000003</b> |
|                                | Yes         | 29 (27.4%)   | 368 (11.7%)  |                 |
| Dyspnoea                       | No          | 96 (90.6%)   | 3002 (95.8%) | <b>0.018051</b> |
|                                | Yes         | 10 (9.4%)    | 131 (4.2%)   |                 |
| Myalgia                        | No          | 72 (67.9%)   | 2883 (92.0%) | < <b>0.0001</b> |
|                                | Yes         | 34 (32.1%)   | 250 (8.0%)   |                 |
| Rhinorrhea                     | No          | 70 (66.0%)   | 2452 (78.3%) | <b>0.004198</b> |
|                                | Yes         | 36 (34.0%)   | 681 (21.7%)  |                 |
| Respiratory discomfort         | No          | 90 (84.9%)   | 2961 (94.5%) | <b>0.000079</b> |
|                                | Yes         | 16 (15.1%)   | 172 (5.5%)   |                 |
| Nausea/ vomit                  | No          | 94 (88.7%)   | 3025 (96.6%) | <b>0.000075</b> |
|                                | Yes         | 12 (11.3%)   | 108 (3.4%)   |                 |
| Headache                       | No          | 50 (47.2%)   | 2399 (76.6%) | < <b>0.0001</b> |
|                                | Yes         | 56 (52.8%)   | 734 (23.4%)  |                 |
| Prostration                    | No          | 83 (78.3%)   | 2968 (94.7%) | < <b>0.0001</b> |
|                                | Yes         | 23 (21.7%)   | 165 (5.3%)   |                 |
| Diarrhea                       | No          | 95 (89.6%)   | 2933 (93.6%) | 0.150267        |
|                                | Yes         | 11 (10.4%)   | 200 (6.4%)   |                 |
| Conjunctivitis                 | No          | 105 (99.1%)  | 3102 (99.0%) | 1               |
|                                | Yes         | 1 (0.9%)     | 31 (1.0%)    |                 |
| Ageusia/ anosmia               | No          | 87 (82.1%)   | 3051 (97.4%) | < <b>0.0001</b> |
|                                | Yes         | 19 (17.9%)   | 82 (2.6%)    |                 |
| Loss of voice                  | No          | 102 (96.2%)  | 3081 (98.3%) | 0.206495        |
|                                | Yes         | 4 (3.8%)     | 52 (1.7%)    |                 |
| Pneumopathy                    | No          | 104 (98.1%)  | 3105 (99.1%) | 0.593166        |
|                                | Yes         | 2 (1.9%)     | 28 (0.9%)    |                 |
| Chronic neurological disease   | No          | 106 (100.0%) | 3094 (98.8%) | 0.482095        |
|                                | Yes         | 0 (0.0%)     | 39 (1.2%)    |                 |
| Pregnant                       | No          | 104 (98.1%)  | 3107 (99.2%) | 0.533509        |
|                                | Yes         | 2 (1.9%)     | 26 (0.8%)    |                 |
| Postpartum                     | No          | 105 (99.1%)  | 3125 (99.7%) | 0.699884        |
|                                | Yes         | 1 (0.9%)     | 8 (0.3%)     |                 |
| Chronic cardiovascular disease | No          | 106 (100.0%) | 3037 (96.9%) | 0.123958        |
|                                | Yes         | 0 (0.0%)     | 96 (3.1%)    |                 |
| Chronic kidney disease         | No          | 103 (97.2%)  | 3086 (98.5%) | 0.489013        |
|                                | Yes         | 3 (2.8%)     | 47 (1.5%)    |                 |
| Obesity                        | No          | 96 (90.6%)   | 3038 (97.0%) | <b>0.000721</b> |
|                                | Yes         | 10 (9.4%)    | 95 (3.0%)    |                 |
| Asthma                         | No          | 102 (96.2%)  | 2964 (94.6%) | 0.609912        |

|                                           |                     |              |              |                 |
|-------------------------------------------|---------------------|--------------|--------------|-----------------|
|                                           | Yes                 | 4 (3.8%)     | 169 (5.4%)   |                 |
|                                           | No                  | 104 (98.1%)  | 3113 (99.4%) |                 |
| Immunodepression                          | Yes                 | 2 (1.9%)     | 20 (0.6%)    | 0.348298        |
|                                           | No                  | 106 (100.0%) | 3118 (99.5%) |                 |
| Chronic liver disease                     | Yes                 | 0 (0.0%)     | 15 (0.5%)    | 1               |
|                                           | No                  | 100 (94.3%)  | 2911 (92.9%) |                 |
| Diabetes                                  | Yes                 | 6 (5.7%)     | 222 (7.1%)   | 0.71047         |
|                                           | No                  | 91 (85.8%)   | 2585 (82.5%) |                 |
| Hypertension                              | Yes                 | 15 (14.2%)   | 548 (17.5%)  | 0.445923        |
|                                           | No                  | 106 (100.0%) | 3129 (99.9%) |                 |
| Transplanted                              | Yes                 | 0 (0.0%)     | 4 (0.1%)     | 1               |
|                                           | No                  | 106 (100.0%) | 3110 (99.3%) |                 |
| Cancer                                    | Yes                 | 0 (0.0%)     | 23 (0.7%)    | 0.766303        |
|                                           | No                  | 73 (68.9%)   | 2211 (70.6%) |                 |
| Any comorbidity                           | Yes                 | 33 (31.1%)   | 922 (29.4%)  | 0.787174        |
|                                           | Hospital            | 8 (7.5%)     | 130 (4.1%)   |                 |
|                                           | None                | 81 (76.4%)   | 2764 (88.2%) |                 |
|                                           | Basic Health Unit   | 8 (7.5%)     | 121 (3.9%)   |                 |
| Sought health assistance                  | Emergency Care Unit | 9 (8.5%)     | 118 (3.8%)   | <b>0.003285</b> |
|                                           | No                  | 103 (97.2%)  | 3098 (98.9%) |                 |
| Admitted in health institution            | Yes                 | 3 (2.8%)     | 35 (1.1%)    | 0.249183        |
|                                           | No                  | 71 (67.0%)   | 2528 (80.7%) |                 |
| Household contact with symptomatic person | Yes                 | 35 (33.0%)   | 605 (19.3%)  | <b>0.000774</b> |
